# Supplementary figures and images for: Multimodal imaging of pancreatic beta cells in vivo by targeting transmembrane protein 27 (TMEM27)
Source: PubMed Central journal article supplement — Diabetologia. 2012 Jul 13;55(9):2407–16. doi: 10.1007/s00125-012-2605-2 (PMC3411300; doi:10.1007/s00125-012-2605-2), 2012-07-13

ESM Fig. 1

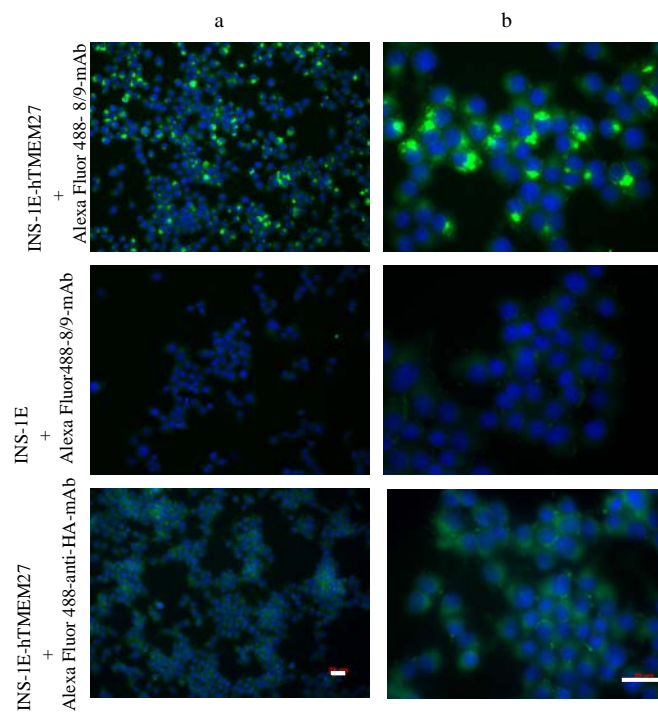

Supplement: 125_2012_2605_MOESM2_ESM.pdf [file 125_2012_2605_MOESM2_ESM.pdf]

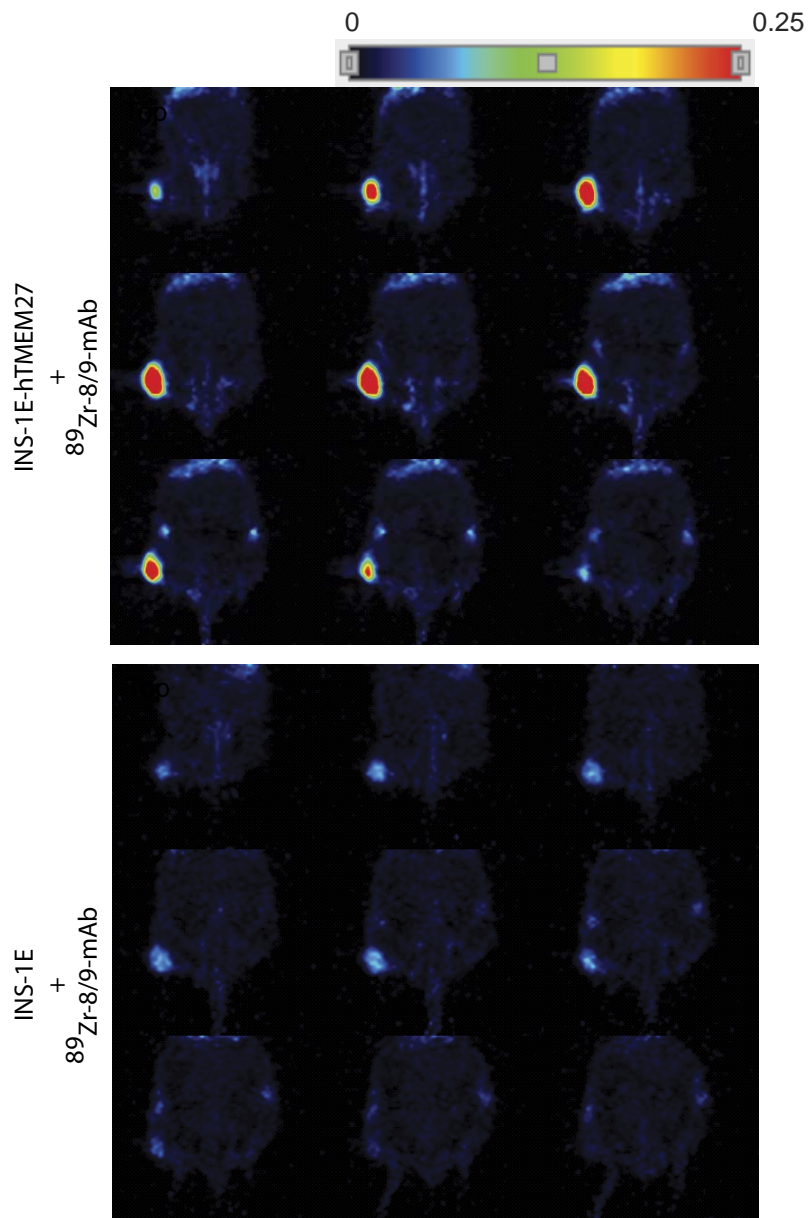

Supplement: 125_2012_2605_MOESM3_ESM.pdf [file 125_2012_2605_MOESM3_ESM.pdf]
